# Supplementary material for: Phylodynamic Analysis of the Emergence and Epidemiological Impact of Transmissible Defective Dengue Viruses
Source: PLOS journal article supplement (doi:10.1371/journal.ppat.1003193), 2013-02-28
Supplement: S10 (10.1371/journal.ppat.1003193.s010) [file journal.ppat.1003193.s010]

**Table S7. Parameter values of the full ODE model.**

| Parameter        | Description                                                                                                                                                                                                                                                                                                                                                | Value                                   | Ref          |
|------------------|------------------------------------------------------------------------------------------------------------------------------------------------------------------------------------------------------------------------------------------------------------------------------------------------------------------------------------------------------------|-----------------------------------------|--------------|
| $N_H$            | Human population in Myanmar                                                                                                                                                                                                                                                                                                                                | 50,000,000                              | <sup>a</sup> |
| $N_V$            | Mosquito population in Myanmar                                                                                                                                                                                                                                                                                                                             | $N_H * 2$                               | [2]          |
| $\beta$          | Transmission rate                                                                                                                                                                                                                                                                                                                                          | 70 year <sup>-1</sup>                   | [2]          |
| $\mu_H$          | Human host birth rate = death rate                                                                                                                                                                                                                                                                                                                         | 1/60 year <sup>-1</sup>                 | [2]          |
| $\mu_V$          | Mosquito birth rate = death rate                                                                                                                                                                                                                                                                                                                           | 365/14 year <sup>-1</sup>               | [2]          |
| $1/\sigma_H$     | Average latent period of human infected with DENV-1 only                                                                                                                                                                                                                                                                                                   | 5/365 year                              | [2]          |
| $1/\sigma_{H,D}$ | Average latent period of dually infected human                                                                                                                                                                                                                                                                                                             | Varies in model                         |              |
| $1/\sigma_V$     | Average incubation period of mosquitoes infected with DENV-1 only                                                                                                                                                                                                                                                                                          | 10/365 year                             | [2]          |
| $1/\sigma_{V,D}$ | Average incubation period of dually infected mosquitoes                                                                                                                                                                                                                                                                                                    | Varies in model                         |              |
| $1/\gamma_H$     | Average infectious period of human infected with DENV-1 only                                                                                                                                                                                                                                                                                               | 6/365 year                              | [2]          |
| $1/\gamma_{H,D}$ | Average infectious period of dually infected human                                                                                                                                                                                                                                                                                                         | Varies in model                         |              |
| <b>a</b>         | Seasonality coefficient for mosquito birth rate                                                                                                                                                                                                                                                                                                            | 0.7 (unless specified)                  | <sup>b</sup> |
| <b>b</b>         | Phase of seasonality. The value of b is chosen such that the number of dengue cases peaks in July as shown in [3].                                                                                                                                                                                                                                         | 0.3                                     | <sup>b</sup> |
| <b>P</b>         | Relative efficiency of tDP-only transmission from dually infected individuals compared to the rate of DENV-1 transmission from singly infected individuals                                                                                                                                                                                                 | Varies in model<br>Baseline value: 0.01 |              |
| <b>Q</b>         | Relative efficiency of DENV-1-only transmission from dually infected individuals compared to the rate of DENV-1 transmission from singly infected individuals                                                                                                                                                                                              | Varies in model<br>Baseline value: 0.01 |              |
| <b>W</b>         | Relative efficiency of dual transmission from dually infected individuals compared to the rate of DENV-1 transmission from singly infected individuals. When the dually infected humans and mosquitoes are considered separately, $W_H$ and $W_V$ denote the relative rates of dual transmission from dually infected humans and mosquitoes, respectively. | Varies in model<br>Baseline value: 1.00 |              |

<sup>a</sup> Source: Myanmar 2000, United Nations.

<sup>b</sup> The seasonality parameters are chosen such that the seasonal pattern in the model simulation is consistent with the monthly case reports in [3].
